# Supplementary material for: Safety and efficacy of canine gonadal tissue-derived mesenchymal stem cells for early myxomatous mitral valve disease
Source: Front Vet Sci. 2024 Oct 2;11:1404607. doi: 10.3389/fvets.2024.1404607 (PMC11480051; doi:10.3389/fvets.2024.1404607)
Supplement: Supplementary file 1 [file Table_1.xlsx]

## Sheet: Supplementary
	MSC												Control
	A1		A2		A3		A4		A5		A6		B1		B2		B3		B4		B5		B6		B7		B8		B9		B10
Time point	Baseline	Endpoint	Baseline	Endpoint	Baseline	Endpoint	Baseline	Endpoint	Baseline	Endpoint	Baseline	Endpoint	Baseline	Endpoint	Baseline	Endpoint	Baseline	Endpoint	Baseline	Endpoint	Baseline	Endpoint	Baseline	Endpoint	Baseline	Endpoint	Baseline	Endpoint	Baseline	Endpoint	Baseline	Endpoint
MR (m/s)	5.4	5.6	3.5	5.4	6.1	5.6	5.3	5.7	0	0	5.7	5.3	4.6	4.9	5.3	6.7	5.2	6.2	5.9	7	0	0	6.3	6.1		6	2.2	3	5	5.2	5.8	4.6
LA (mm)	18	11.9	18.7	21.1	16.5	18.3	24.2	23	13.1	12	12.1	13.4	16.6	17.9	11.9	14.7	18.3	21	15	22.8	17.4	18.8	14.5	17.6		19	8.7	12.6	17.6	17.5	17.2	17.7
LA/Ao	1.8	1	1.1	1.2	1.4	1.5	1.5	1.7	1.1	1.3	1.3	1.5	1.4	1.5	1.2	1.3	1.4	1.8	1.2	2	1.5	1.4	1.4	1.5	1.2	1.8	0.8	1.1	1.2	1.4	1.3	1.4
LVIDd (mm)	29.2	19.8	23.8	23.9	22.9	26.2	23.6	28.6	13.7	10.4	14.4	20.2	28.6	30.7	15.9	20.6	25	26.9	27	29.5	20.7	22.6	21.7	25		21.7	19.5	17.6	22.4	20.3	25.4	27.7
LVIDd inc%	21	-16.4	-24.7	-24.9	-0.4	13.1	-9.8	6.9	-31.2	-48.1	-30.5	0.7	13.2	19.7	-25.5	1.7	7.2	15.3	12.7	18.1	-16.7	-8.5	-5.6	8.7	-2.2	-9.2	-13.8	-18.1	-17.4	-23.1	-2	7.7
LVIDd/Ao	2.9	2	1.4	1.3	1.9	2.1	1.5	2.1	1.1	1.1	1.5	2.3	2.4	2.6	1.6	1.9	1.9	2.4	2.2	2.6	1.8	1.7	2	2.2	2	2.1	1.8	1.6	1.6	1.7	1.9	2.1
LVIDdN	1.9	1.3	1	1	1.5	1.7	1.4	1.6	1	1	1.1	1.5	1.7	1.8	1	1.6	1.6	1.8	1.7	1.8	1	1.4	1	1.7	1	1.5	1	1.3	1.3	1.2	1.5	1.6
E vel (m/s)	1.1	0.8	0.4	0.4	0.8	0.6	0.7	0.9	0.6	0.5	0.8	0.7	1	1.1	0.9	1	1	1.8	1.2	1.1	0.6	0.8	0.8	0.9	0.6	1.2	0.7	0.7	0.7	0.7	0.6	0.8
E/E'	13.5	16.2	9.1	12.9	7.3	7.8	6.6	19.9	24	10.6	11.9	22.8	6.9	13.4	18.8	22.7	16.1	25	22.2	27.6	8.2	15.1	12.9	14.1	14.1	11	15.6	11.6	10	14	11.1	17.4
E/IVRT		1.1	0.5	0.4	1.6	1.4	1	0.7	0.8	0.9	1.5	0.9	2.1	1.4	1.1	1.3	1.3	3	2.5	2.1	1.2	1.5	1.1	1.9		2.5	0.9	0.8	1.1	0.8	0.7	2.1
EDVI (vet teich.)	58.1	24.8	24.6	24.6	36.1	48.3	32		13.7	7.1	14.5	33.1	52	59.7	17.5	34.1	43.1	50.8	49.3	56.7	25.6	31.6	31.9	44	68.2	30.2	25.6	21.9	26.9	22.3	38.4	47.2
E/A	1.2	1	0.6	0.7	1.6	0.6	1.2	1.5	0.8	0.6	1.3	1.2	1.4	1.2	1.3	1.2	1.1	1.4	1.1	1.3	0.8	0.8	0.9	0.9	1.3	1.1	1.2	1.4	1.2	1.2	1.2	1.3
E'/A'	1.4	0.8	0.6	0.7	1	0.9	0.8	0.7	0.4	0.4	1.6	0.8	1	0.9	0.8	0.6	0.7	1.1	0.8	1.1	0.8	0.6	0.5	0.9	0.6	0.9	0.7	1.6	0.8	0.6	0.7	0.8
IVRT	0	72	85	111	51	39	64	117	72	58	53	83	48	77	81	78	75	61	48	53	51	53	72	48		48	76	81	63	83	89	36
E/E'	13.5	16.2	9.1	12.9	7.3	7.8	6.6	19.9	24	10.6	11.9	22.8	6.9	13.4	18.8	22.7	16.1	25	22.2	27.6	8.2	15.1	12.9	14.1		11	15.6	11.6	10	14	11.1	17.4
SF (%)	49.5	49.7	30.3	31.8	47.2	39.3	32.6	38	59.9	52.9	49.3	51	40.6	29.3	53.5	52.4	53.6	57.6	64.1	46.8	54.6	58.4	61.8	50	31.3	73.7	49.2	55	32.6	36	45.3	46.9
ESVI (vet teich.)	2.7	3.7	7.8	7.4	6	11.1	9.3	9.3	1.2	0.9	2.2	4.7	11.4	19.2	2.1	4.5	5.3	5.1	3.4	9.7	3	3	2.5	6.5	26.3	0.9	3.9	2.5	7.8	5.8	6.9	8
LVIMP (Tei index)	0.8	0.4	1.5	0.47	0.09	0.82	0.75	0.65	0	0.97	0.59	0.98	0.43	0.29	0.38	0.43	0.39	0.26	0.58	1.67	1.39	1.77	0.24	0.37		0.87	1.28	0.63	0.33	-1	0.24
LV S'max	9.5	9.7	9.7	6.9	10.3	7.9	8.8	7.6	5.1	10.8	5.1	4.1	12.1	10.5	8	7.7	10.2	9.1	9.4	4.6	8.7	8.6	16	8.2		14.6	6.7	4.5	7.3	8.9	6.5	7.3
AV flow (m/s)	1.1	1.3	0.9	0.9	1.2	1.2	1.4	1	0.9	0.9	0.8	0.7	1.3	1	1.1	1.1	1.4	1.3	1.6	1.3	1.1	1.1	1.1	1.2	0.9	1.1	0.9	0.9	1.3	0.8	0.9	0.8
PV flow (m/s)	0.7	1.3	0.7	0.8	0.9	0.6	1		1.8	1.3	0.9	0.9	1	0.9	0.8	0.8	1.2	1.2	1	1.1	0.9	1	1.3	1	0.6	0.7	0.8	0	1	0.8	0.6	0.7
AR vel (m/s)	0	0		0	0	0	0	0	0	2.9	0		0	0		0	2.6	0		0	0	0		3.2				0	0	0	0	0
PR vel (m/s)	0	0		0		0	2.1	1.7			2.8			0		0		0		0	0	0				3.2		0	1.6	1.8	0	1.8
TR vel (m/s)					2.6	2.5	2.9	2.2	0	0				0		2.3		0		0		0		2.5	2.9				0	0	2.5	0
VHS	10	9.8	9.7	10.1	11	11	10.8	11.1	10	10	9	9.7		10.7	9.5	10	9.8	11	10.1	10.6	9.6	9.6	9.5	9.8	9.6	10.3	9.6	10	10.2	10.3	10.1	9.8
VLAS	2	2	2	2.1	2.7	2.5	1.9	2	2.1	2.2	2	2.4		2.3	2.3	2.3	1.9	2.4	2.5	2.5	2	2	2.1	2.1	2	2	2	2.1	2	2	2	2
proBNP	1440	503	850	1287	1532	1721.6	584	1500			930	1058.4	386	500	2116	3077	1514.1	1116.1			416	498	1400	2400	250	620	529	545.8	904	754.8	500	500
BW	4.26	4.36	11.8	12.1	4	4.1	6.2	6.71	2.5	2.5	2.71	2.51	5.5	5.5	3.1	2.6	4.12	4.2	5.2	5.6	5.2	5.1	4	4	4.94	5.06	3.8	3.2	7	6.4	6	5.96
Progression (day)		1056		1380		834		782		1467		992		234		501		936		730		932		403		489		1008		588		407
